# Supplementary material for: Splenectomy modulates early immuno-inflammatory responses to trauma-hemorrhage and protects mice against secondary sepsis
Source: PubMed Central journal article supplement (PMC6173732; doi:10.1038/s41598-018-33232-1), 2018-10-05
Supplement: 41598_2018_33232_MOESM1_ESM.pdf [file 41598_2018_33232_MOESM1_ESM.pdf]

# **Splenectomy modulates early immuno-inflammatory responses to trauma-hemorrhage and protects mice against secondary sepsis**

S. Drechsler<sup>1</sup>, P. Rademann<sup>1,2</sup>, J. Zipperle<sup>1</sup>, M. Jafarmadar<sup>1</sup>, A. Klotz<sup>1</sup>, S. Bahrami<sup>1</sup>, M.F. Osuchowski<sup>1</sup>

<sup>1</sup>Ludwig Boltzmann Institute for Experimental and Clinical Traumatology in the AUVA Research Center , Vienna, Austria

<sup>2</sup>Current Address: Center for Experimental Medicine, Medical Faculty, University of Cologne, Cologne, Germany

# Supplementary Figure 1

**a** **Gating strategy for flow cytometric analysis of peripheral leukocytes.** Representative gating strategy for leukocyte subsets with an emphasis on (a) Lymphocytes and (b) Monocytes. Diluted peripheral whole blood was subjected to RBC lysis and divided into a Lymphocyte and Monocyte panel. Lymphocytes (a): A CD4+CD8a- population was gated from all captured events and further assessed for the positivity for CD25. Using fluorescence-minus-one (FMO) stainings, the respective population was then plotted against CD127 to identify a CD4+CD25+CD127- subset. Monocytes (b) All captured events were analyzed for the presence of CD11b and Ly6G and were divided into CD11b+Ly6Ghigh, CD11b+Ly6Glow and CD11b-Ly6G-. The defined populations were then regated in dot blots with fluorescence channels for MHCII and CD11b versus side scatter (SSC). In addition, simultaneous stainings with CD11b and F4/80 were carried out to confirm gating based on CD11b signal versus SSC. Fluorescence from a specific antigen is given as mean fluorescence intensity (MFI) from the respective conjugate. Absolute counts of identified events were calculated per volume and given as events/ $\mu$ L.

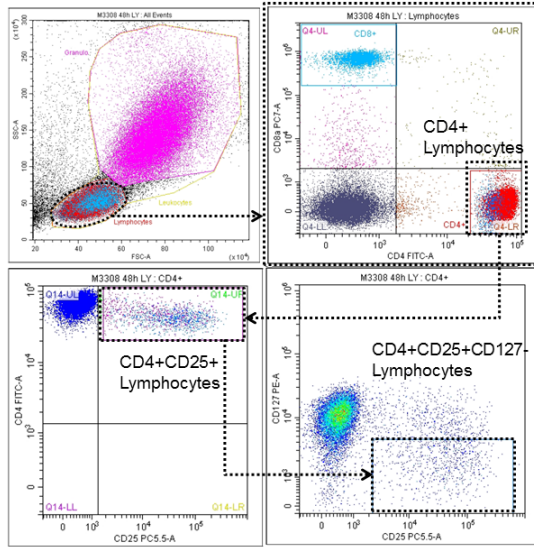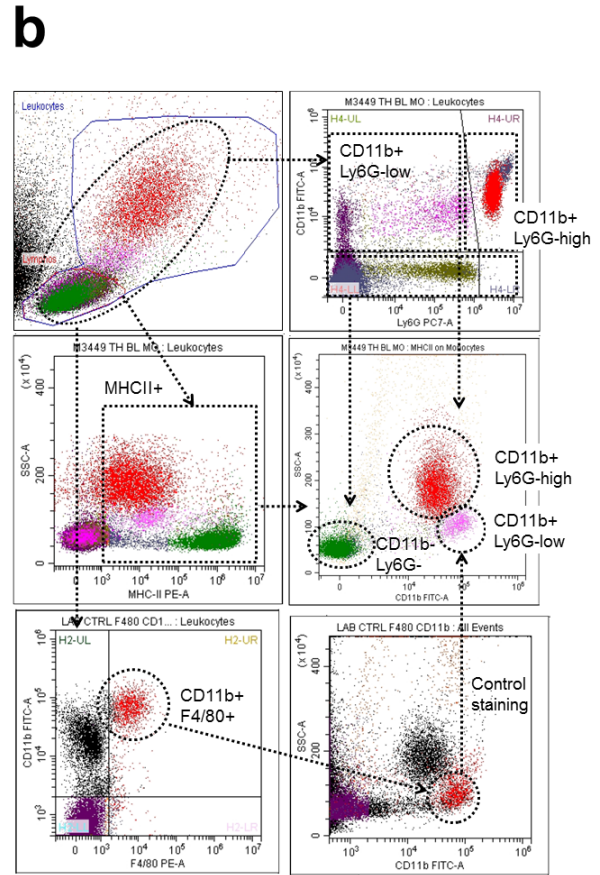

Supplementary Figure 2

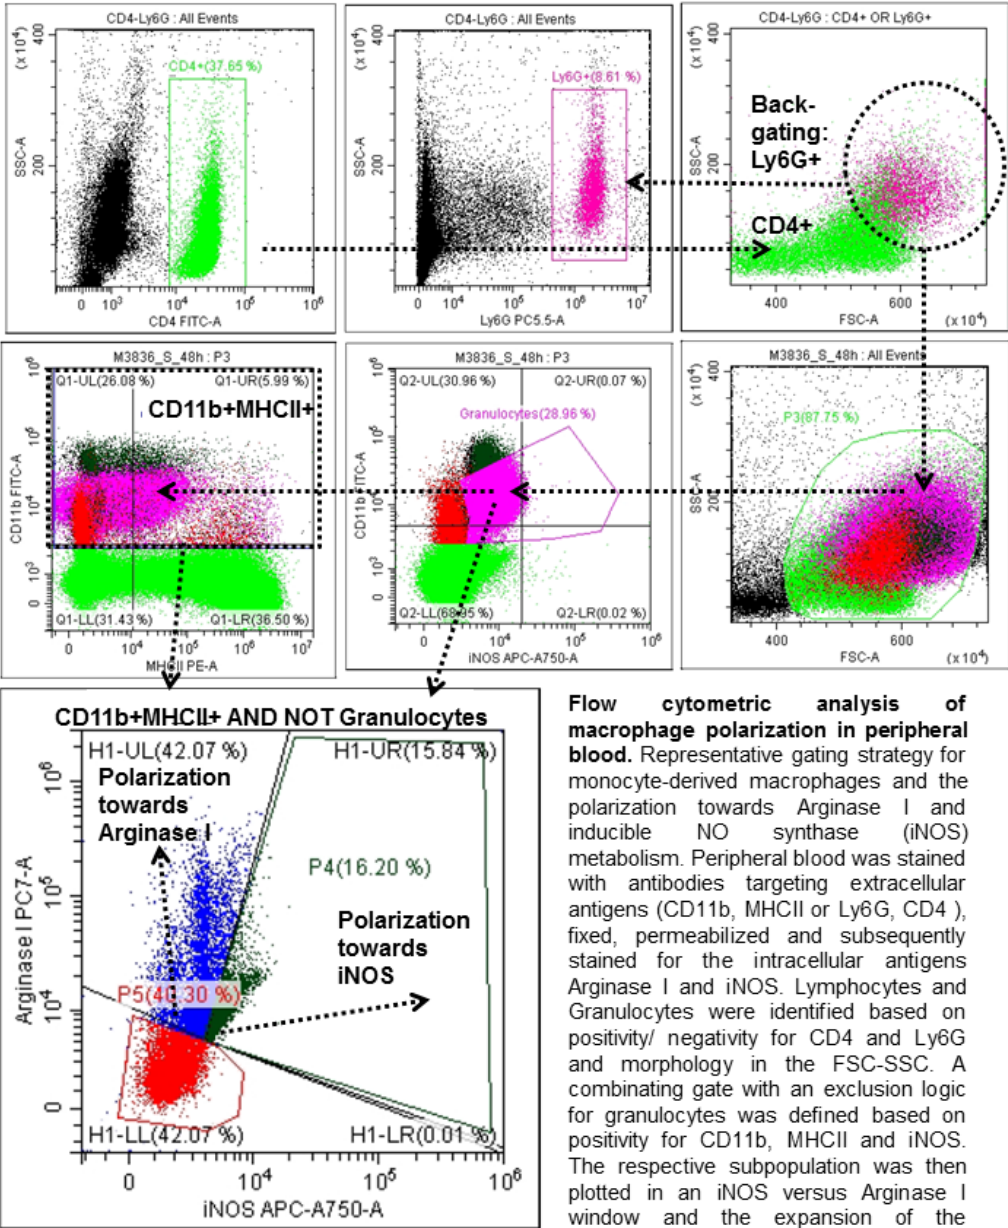

**Flow cytometric analysis of macrophage polarization in peripheral blood.** Representative gating strategy for monocyte-derived macrophages and the polarization towards Arginase I and inducible NO synthase (iNOS) metabolism. Peripheral blood was stained with antibodies targeting extracellular antigens (CD11b, MHCII or Ly6G, CD4), fixed, permeabilized and subsequently stained for the intracellular antigens Arginase I and iNOS. Lymphocytes and Granulocytes were identified based on positivity/ negativity for CD4 and Ly6G and morphology in the FSC-SSC. A combining gate with an exclusion logic for granulocytes was defined based on positivity for CD11b, MHCII and iNOS. The respective subpopulation was then plotted in an iNOS versus Arginase I window and the expansion of the population towards increased Arginase I or iNOS expression was defined as polarized activation.
